# Supplementary material for: Shaping the lipid composition of bacterial membranes for membrane protein production
Source: Microb Cell Fact. 2019 Aug 10;18:131. doi: 10.1186/s12934-019-1182-1 (PMC6689329; doi:10.1186/s12934-019-1182-1)
Supplement: Supplementary file 2 — Additional file 2. Relative quantifications of phospholipids (PE, PG, CL). The tables show the phospholipid assignations of the m/z peaks and the results of the statistical analyses. [file 12934_2019_1182_MOESM2_ESM.xlsx]

## Sheet: PE
Relative quantification of detected PE species and ANOVA analysis of the results
	Peak	Phospholipid asignation		Ecoli strain	% relative intensity		ANOVA	C41(DE3) vs C41(DE3)Δ(ompF)	C41(DE3) vs C41(DE3)Δ(ompF-acrAB)	C41(DE3)Δ(ompF) vs C41(DE3)Δ(ompF-acrAB)
	m/z	Mass	FA species		Average	s	p-value	p-value	p-value	p-value
	634.44	28:0	12:0 + 16:0 14:0 + 14:0	C41(DE3)	6.50811	2.74781	0.5955	0.99	0.6904	0.614
				C41(DE3)Δ(ompF)	6.30057	1.65634
				C41(DE3)Δ(ompF-acrAB)	7.81098	0.606678
	648.46	29:0	14:0 + 15:0 12:0 + 17:0	C41(DE3)	2.21776	1.12471	0.1579	0.8789	0.2924	0.1587
				C41(DE3)Δ(ompF)	1.60693	0.403571
				C41(DE3)Δ(ompF-acrAB)	4.29566	2.36311
	660.46	30:1	14:0 + 16:1	C41(DE3)	10.4188	1.52788	0.9724	0.9756	0.9788	0.9999
				C41(DE3)Δ(ompF)	10.2174	0.34859
				C41(DE3)Δ(ompF-acrAB)	10.2315	1.26315
	662.48	30:0	14:0 + 16:0	C41(DE3)	47.0972	7.99349	0.8328	0.9527	0.818	0.9467
				C41(DE3)Δ(ompF)	45.831	3.74938
				C41(DE3)Δ(ompF-acrAB)	44.4836	1.87759
	674.49	31:1	15:0 + 16:1 14:0 + 17:0 cyclo	C41(DE3)	4.85284	1.33832	0.1423	0.6747	0.1284	0.3783
				C41(DE3)Δ(ompF)	6.15648	0.158963
				C41(DE3)Δ(ompF-acrAB)	8.31301	2.86241
	676.49	31:0	15:0 + 16:0	C41(DE3)	4.10198	2.05966	0.1003	0.9294	0.1762	0.1104
				C41(DE3)Δ(ompF)	3.2	0.747008
				C41(DE3)Δ(ompF-acrAB)	9.19759	4.73559
	688.49	32:1	16:0 + 16:1	C41(DE3)	98.1927	1.92034	0.0001	0.0005	0.0001	0.158
				C41(DE3)Δ(ompF)	74.3967	5.31711
				C41(DE3)Δ(ompF-acrAB)	68.0628	2.61098
	702.5	33:1	16:0 + 17:0 cyclo	C41(DE3)	77.3973	10.2421	0.0214	0.0237	0.0505	0.8073
				C41(DE3)Δ(ompF)	98.6833	2.28068
				C41(DE3)Δ(ompF-acrAB)	95.0261	6.26586
	714.5	34:2	16:1 + 18:1	C41(DE3)	23.4134	1.74745	0.0081	0.0726	0.0067	0.169
				C41(DE3)Δ(ompF)	20.4148	0.697042
				C41(DE3)Δ(ompF-acrAB)	18.135	1.31903
	716.52	34:1	16:0 + 18:1	C41(DE3)	93.2211	11.7414	0.5725	0.8921	0.5472	0.8032
				C41(DE3)Δ(ompF)	95.9068	3.92662
				C41(DE3)Δ(ompF-acrAB)	99.6604	0.588233
	728.5	35:2	17:0 cyclo + 18:1	C41(DE3)	11.8546	2.58477	0.0043	0.0048	0.0126	0.6319
				C41(DE3)Δ(ompF)	19.4549	1.32844
				C41(DE3)Δ(ompF-acrAB)	18.0697	1.06392
	730.54	30:1	16:0 + 19:0 cyclo 17:0 +18:1	C41(DE3)	14.1617	3.94751	0.0047	0.0327	0.0041	0.2009
				C41(DE3)Δ(ompF)	24.2256	0.682898
				C41(DE3)Δ(ompF-acrAB)	30.0172	4.78862
	742.54	36:2	18:1 + 18:1	C41(DE3)	44.259	6.10999	0.3858	0.9954	0.4263	0.3858
				C41(DE3)Δ(ompF)	43.9879	1.53318
				C41(DE3)Δ(ompF-acrAB)	40.2763	0.268095
	756.55	37:2	18:1 + 19:0 cyclo	C41(DE3)	4.9073	1.25239	0.0015	0.0022	0.0028	0.9553
				C41Δ(DE3)(ompF)	8.75669	0.486506
				C41Δ(DE3)(ompF-acrAB)	8.57358	0.0389803
Two way ANOVA was performed to look for differences between groups for each MS peak.
p-values for two-to-two comparations were calculated using a one-way ANOVA followed by a Tukey multiple comparisons test.
Highlined in green are the PE species where significant differences were found (p < 0.05) for at least one of the groups.

## Sheet: PG
Relative quantification of detected PG species and ANOVA analysis of the results
	Peak	Phospholipid asignation		Ecoli strain	% relative intensity		ANOVA	C41(DE3) vs C41(DE3)Δ(ompF)	C41(DE3) vs C41(DE3)Δ(ompF-acrAB)	C41(DE3)Δ(ompF) vs C41(DE3)Δ(ompF-acrAB)
	m/z	Mass	FA species		Average	s	p-value	p-value	p-value	p-value
	691.45	30:1	14:0 + 16:1 14:1 + 16:0 12:0 + 18:1	C41(DE3)	2.94888	0.304437	0.0034	0.9455	0.0049	0.0067
				C41Δ(DE3)(ompF)	2.86683	0.43119
				C41Δ(DE3)(ompF-acrAB)	1.62046	0.128678
	693.47	30:0	14:0 + 16:0	C41(DE3)	10.3907	1.65536	0.0032	0.1488	0.0027	0.0026
				C41Δ(DE3)(ompF)	1.75554	0.464192
				C41Δ(DE3)(ompF-acrAB)	5.45364	0.532081
	705.47	31:1	N.I.	C41(DE3)	1.46283	0.316941	0.9763	0.9985	0.9788	0.9883
				C41(DE3)Δ(ompF)	1.47859	0.0830722
				C41(DE3)Δ(ompF-acrAB)	1.52349	0.56267
	707.49	31:0	N.I.	C41(DE3)	1.37619	0.352972	0.3682	0.6349	0.8347	0.345
				C41(DE3)Δ(ompF)	0.956457	0.23073
				C41(DE3)Δ(ompF-acrAB)	1.63463	0.745578
	719.48	32:1	16:0 + 16:1	C41(DE3)	36.0979	6.68234	0.0143	0.324	0.0123	0.0791
				C41Δ(DE3)(ompF)	30.697	1.91368
				C41Δ(DE3)(ompF-acrAB)	21.4588	2.0819
	733.5	33:1	16:0 + 17:0 cyclo	C41(DE3)	14.9455	3.41579	0.0863	0.0898	0.174	0.8653
				C41(DE3)Δ(ompF)	23.0093	3.26313
				C41(DE3)Δ(ompF-acrAB)	21.4006	4.57764
	745.5	34:2	16:1 + 18:1	C41(DE3)	8.27474	1.11759	0.0265	0.9905	0.0433	0.0369
				C41Δ(DE3)(ompF)	8.38383	1.12946
				C41Δ(DE3)(ompF-acrAB)	5.63544	0.750479
	747.51	34:1	16:0 + 18:1	C41(DE3)	51.5234	2.51404	0.0079	0.1075	0.1087	0.0064
				C41Δ(DE3)(ompF)	61.2476	7.8381
				C41Δ(DE3)(ompF-acrAB)	41.8351	1.60824
	759.5	35:2	N.I.	C41(DE3)	2.47224	0.462536	0.0105	0.0085	0.1208	0.1384
				C41Δ(DE3)(ompF)	4.9979	0.835691
				C41Δ(DE3)(ompF-acrAB)	3.76412	0.653445
	761.53	35:1	17:0 + 18:1 16:0 + 19:0 cyclo	C41(DE3)	6.54999	1.80812	0.0168	0.0154	0.069	0.4616
				C41Δ(DE3)(ompF)	12.7753	1.79538
				C41Δ(DE3)(ompF-acrAB)	10.8402	2.0015
	773.53	36:2	18:1 + 18:1	C41(DE3)	18.8208	0.593591	0.0003	0.0063	0.0105	0.0003
				C41Δ(DE3)(ompF)	25.4526	2.70906
				C41Δ(DE3)(ompF-acrAB)	13.3145	0.661734
	787.54	37:2	18:1 + 19:0 cyclo	C41(DE3)	1.42785	0.227896	< 0.0001	< 0.0001	0.0778	0.0004
				C41Δ(DE3)(ompF)	3.83502	0.37435
				C41Δ(DE3)(ompF-acrAB)	2.0184	0.144943
Two way ANOVA was performed to look for differences between groups for each MS peak.
p-values for two-to-two comparations were calculated using a one-way ANOVA followed by a Tukey multiple comparisons test.
Highlighted in green are the PG species where significant differences were found (p < 0.05) for at least one of the groups.
N.I. accounts for not identified PG

## Sheet: CL
Relative quantification of detected CL species and ANOVA analysis of the results
	Peak	Phospholipid asignation		Ecoli strain	% relative intensity		ANOVA	C41(DE3) vs C41(DE3)Δ(ompF)	C41(DE3) vs C41(DE3)Δ(ompF-acrAB)	C41(DE3)Δ(ompF) vs C41(DE3)Δ(ompF-acrAB)
	m/z	Mass	FA species		Average	s	p-value	p-value	p-value	p-value
	1321.92	-	N.I.	C41(DE3)	1.8927	0.453099	0.00189	0.1227	0.0159	0.2831
				C41Δ(DE3)(ompF)	1.33929	0.0955983
				C41Δ(DE3)(ompF-acrAB)	0.942025	0.184101
	1335.93	-	N.I.	C41(DE3)	1.05897	0.500183	0.9387	0.9352	0.9701	0.9387
				C41(DE3)Δ(ompF)	0.957669	0.0710996
				C41(DE3)Δ(ompF-acrAB)	0.990974	0.34669
	1347.93	64:2	16:0 + 16:1 / 16:0 + 16:1	C41(DE3)	5.59562	0.146208	< 0.0001	0.0012	< 0.0001	0.0004
				C41Δ(DE3)(ompF)	4.33853	0.111179
				C41Δ(DE3)(ompF-acrAB)	2.80592	0.347834
	1349.95	64:1	16:0 + 16:0 / 16:0 + 16:1 16:0 + 16:0 / 14:0 + 18:1	C41(DE3)	5.72461	0.822588	0.005	0.1451	0.0041	0.0451
				C41Δ(DE3)(ompF)	4.67169	0.424353
				C41Δ(DE3)(ompF-acrAB)	3.17986	0.389038
	1373.94	66:3	16:0 + 16:1 / 16:1 + 18:1	C41(DE3)	2.37186	0.1633	< 0.0001	0.1888	< 0.0001	0.0001
				C41Δ(DE3)(ompF)	2.18932	0.0976002
				C41Δ(DE3)(ompF-acrAB)	1.27215	0.0255455
	1375.96	66:2	16:0 + 16:1 / 16:0 + 18:1	C41(DE3)	14.3542	0.907579	0.0011	0.7746	0.0014	0.0025
				C41Δ(DE3)(ompF)	13.8347	0.95312
				C41Δ(DE3)(ompF-acrAB)	9.42111	0.881565
	1387.96	67:3	16:0 + 17:0 cyclo / 16:1 + 18:1	C41(DE3)	0.117431	0.00750818	0.0001	0.0475	0.0001	0.0009
				C41Δ(DE3)(ompF)	0.0868424	0.0186156
				C41Δ(DE3)(ompF-acrAB)	0.0168753	0.00569051
	1389.98	67:2	16:0 + 17:0cyclo / 16:0 + 18:1 16:0 + 18:1 / 17:0 + 18:1	C41(DE3)	5.94467	1.49366	0.0781	0.0693	0.2625	0.5744
				C41(DE3)Δ(ompF)	9.06184	0.913714
				C41(DE3)Δ(ompF-acrAB)	7.89253	1.5779
	1401.98	68:3	16:0 + 18:1 / 16:1 + 18:1	C41(DE3)	4.8175	0.440391	0.0038	0.1983	0.0255	0.0033
				C41Δ(DE3)(ompF)	6.23901	0.207054
				C41Δ(DE3)(ompF-acrAB)	7.01367	0.673209
	1403.98	68:2	16:0 + 18:1 / 16:0 + 18:1	C41(DE3)	11.6023	0.82758	0.0251	0.1008	0.4833	0.0226
				C41Δ(DE3)(ompF)	12.7843	1.26148
				C41Δ(DE3)(ompF-acrAB)	15.2086	1.38657
	1418	69:2	16:0 + 18:1 / 16:0 + 19:0cyclo 16:0 + 18:1 / 17:0 + 18:1	C41(DE3)	4.50226	1.40072	0.0519	0.0972	0.0599	0.9226
				C41(DE3)Δ(ompF)	2.22633	0.714088
				C41(DE3)Δ(ompF-acrAB)	4.20255	0.506067
	1430	70:3	16:0 + 18:1 / 18:1 + 18:1	C41(DE3)	5.93673	0.267824	0.0477	0.0515	0.8541	0.1018
				C41(DE3)Δ(ompF)	5.49295	0.461893
				C41(DE3)Δ(ompF-acrAB)	7.98484	1.65231
	1444.02	-	N.I.	C41(DE3)	1.5579	0.378076	0.0237	0.0366	0.0351	0.9994
				C41Δ(DE3)(ompF)	0.658951	0.244577
				C41Δ(DE3)(ompF-acrAB)	1.54877	0.345927
	1456.02	-	N.I.	C41(DE3)	0.600312	0.238353	0.171	0.9257	0.286	0.179
				C41(DE3)Δ(ompF)	1.19659	0.604561
				C41(DE3)Δ(ompF-acrAB)	1.33006	0.377719
Two way ANOVA was performed to look for differences between groups for each MS peak.
p-values for two-to-two comparations were calculated using a one-way ANOVA followed by a Tukey multiple comparisons test.
Highlighted in green are the CL species where significative differences were found (p < 0.05) for at least one of the groups.
N.I. account for not identified CL
